# Supplementary material
Source: PubMed Central journal article supplement (PMC6485470)
Supplement: NIHMS58235-supplement-1.pdf [file NIHMS58235-supplement-1.pdf]

## Analysis of polymorphic markers around the CTPS1 mutation (rs145092287) identified in patients

| Polymorphic markers | Position          | Patients   |            |            |            |            |            |            |            |
|---------------------|-------------------|------------|------------|------------|------------|------------|------------|------------|------------|
|                     |                   | P1.1       | P1.2       | P2.1       | P2.2       | P3.1       | P3.2       | P4         | P5         |
| D1S2657             | 1:40044958        | n.d.       | n.d.       | 155/153    | 155/153    | n.d.       | n.d.       | n.d.       | 155/152    |
| D1S1598             | 1:40342161        | 120/119    | 120/119    | 120/120    | 120/120    | n.d.       | n.d.       | n.d.       | 120/120    |
| D1S2743             | 1:40714906        | 178/178    | 178/78     | 178/178    | 178/178    | 180/178    | 180/178    | 179/177    | 178/178    |
| D1S2632             | 1:40940613        | 265/265    | 265/265    | 265/265    | 265/265    | 265/265    | 265/265    | 265/265    | 265/265    |
| <b>rs145092287</b>  | <b>1:41475832</b> | <b>+/+</b> |
| D1S2722             | 1: 41553470       | 203/203    | 203/203    | 203/203    | 203/203    | 203/203    | 203/203    | 203/203    | 203/203    |
| D1S3721             | 1:41723472        | 228/228    | 228/228    | 225/225    | 225/225    | 229/229    | 229/229    | 232/228    | 229/229    |
| D1S2645             | 1:42256578        | 277/277    | 281/277    | 281/281    | 281/281    | 281/279    | 281/279    | n.d.       | 281/279    |

n.d., not determined.

The physical position of each polymorphic marker is indicating according to NCBI.

The size of each allele is indicated in base pair.

Homozygous polymorphic markers are in red and those shared by all patients are highlighted with a grey background.
