# Supplementary material
Source: PubMed Central journal article supplement (PMC6485470)
Supplement: NIHMS58235-supplement-ED_Table_1.pdf [file NIHMS58235-supplement-ED_Table_1.pdf]

| Patient                                         | P1.1                  | P1.2                     | P2.1               | P2.2                      | P3.1*              | P3.2*              | P4                 | P5**             |
|-------------------------------------------------|-----------------------|--------------------------|--------------------|---------------------------|--------------------|--------------------|--------------------|------------------|
| Age (months)                                    | 38                    | 113                      | 110                | 48                        | 60                 | 20                 | 24                 | 60               |
| <b>Cell subsets (cells.mm<sup>-3</sup>)</b>     |                       |                          |                    |                           |                    |                    |                    |                  |
| PMN (1800-8000)                                 | 2300                  | 1100                     |                    | 4500                      | 1100               |                    | 6400               | <b>450</b>       |
| Lymphocytes (1700-6900)                         | 3500                  | 3400                     | <b>400</b>         | <b>1600</b>               | <b>200</b>         | 2400               | 4000               | <b>440</b>       |
| CD3 <sup>+</sup> (900-4500)                     | 4390                  | 1680                     | <b>280</b>         | 990                       | <b>80</b>          | 1461               | 2160               | <b>340</b>       |
| CD4 <sup>+</sup> (500-2400)                     | 1410                  | 680                      | <b>160</b>         | 570                       | <b>43</b>          | <b>1095</b>        | 1320               | <b>314</b>       |
| CD8 <sup>+</sup> (300-1600)                     | 2580                  | 910                      | <b>120</b>         | 480                       | <b>28</b>          | <b>346</b>         | 880                | <b>35</b>        |
| CD19 <sup>+</sup> (200-2100)                    | 1010                  | 540                      | <b>60</b>          | <b>170</b>                | <b>12</b>          | 297                | 760                | <b>13</b>        |
| CD56 <sup>+</sup> (100-1000)                    |                       | 480                      | <b>30</b>          | 120                       | <b>20</b>          | 128                |                    | <b>16</b>        |
| <b>T-cell proliferation</b>                     |                       |                          |                    |                           |                    |                    |                    |                  |
| PHA                                             | <b>low</b>            | normal                   |                    | normal                    |                    |                    |                    | normal           |
| <b>Serum immunoglobulins (g.L<sup>-1</sup>)</b> |                       |                          |                    |                           |                    |                    |                    |                  |
| IgG                                             | 24.7<br>(6.1-10.7)    | 29.5<br>(8.3-14.3)       | 10.6<br>(8.3-14.3) | <b>5.53</b><br>(6.8-11.8) | 12.8<br>(6.8-11.8) | 24.5<br>(5.3-10.1) | 17.9<br>(6.8-11.8) | 4.8<br>(4.2-8)   |
| IgG2                                            | <b>&lt;0.1</b><br>(4) |                          | <b>0.23</b><br>(4) | <b>0.2</b><br>(4)         |                    |                    |                    |                  |
| IgA                                             | 0.6<br>(0.5-1.1)      | 1.72<br>(1-1.9)          | 0.74<br>(1-1.9)    | <b>0.42</b><br>(0.7-1.3)  | 8.73<br>(0.7-1.3)  | 1<br>(0.3-0.8)     | 1.5<br>(0.7-1.3)   | 4.4<br>(0.2-0.7) |
| IgM                                             | 0.84<br>(0.5-1.1)     | <b>0.37</b><br>(0.7-1.3) | 0.72<br>(0.7-1.3)  | <b>0.42</b><br>(0.5-1.1)  | 0.76<br>(0.5-1.1)  | 1.4<br>(0.5-1.1)   | 1.2<br>(0.5-1.1)   | 0.8<br>(0.5-1.1) |
| <b>Specific antibodies (IU.ml<sup>-1</sup>)</b> |                       |                          |                    |                           |                    |                    |                    |                  |
| Tetanus (> 0.1)                                 | 0.16                  |                          | 0.48               | <b>0.05</b>               | 1.44               |                    | <b>0.03</b>        | 0.57             |
| <i>H. influenzae</i> type B (>1)                | 7.0                   |                          | <b>0.74</b>        | <b>0.5</b>                | <b>0.86</b>        |                    |                    | <b>0.06</b>      |
| <i>S. Pneumoniae</i> (> 0.35)                   | <b>low</b>            |                          | protective         | <b>low</b>                | <b>low</b>         |                    | <b>low</b>         | <b>low</b>       |

PMN, polymorphonuclear neutrophils. PHA, phytohaemagglutinin. Ig, immunoglobulin.

In bold correspond to values below normal age-matched ranges that are indicated in brackets.

\*when acutely unwell with VZV.

\*\*at presentation with EBV-driven LPD
