# Supplementary material
Source: PubMed Central journal article supplement (PMC6485470)
Supplement: NIHMS58235-supplement-ED_Table_2.pdf [file NIHMS58235-supplement-ED_Table_2.pdf]

|                                                                                                                               | Normal values<br>(age-matched) | 8 years   | 9 years   |
|-------------------------------------------------------------------------------------------------------------------------------|--------------------------------|-----------|-----------|
| Lymphocytes (cells.mm <sup>-3</sup> )                                                                                         | (1900-3700)                    | 1700      | 1800      |
| <b>T cells</b>                                                                                                                |                                |           |           |
| CD3 <sup>+</sup> (cells.mm <sup>-3</sup> )                                                                                    | (1200-2600)                    | 1207      | 1188      |
| CD4 <sup>+</sup> (cells.mm <sup>-3</sup> )                                                                                    | (650-1500)                     | 527       | 396       |
| CD8 <sup>+</sup> (cells.mm <sup>-3</sup> )                                                                                    | (370-1100)                     | 612       | 720       |
| CD4/CD8 ratio                                                                                                                 | (0.9-2.6)                      | 0.86      | 0.48      |
| TCRα/β (%)                                                                                                                    | (26-85)                        | 74        | 75        |
| TCRγ/δ (%)                                                                                                                    | (0.2-14)                       | 1.3       | 1         |
| CD31 <sup>+</sup> CD45RA <sup>+</sup> / CD4 <sup>+</sup> (recent naïve thymic emigrant) (%)                                   | (43-55)                        | 47        | 39        |
| CD45RO <sup>+</sup> / CD4 <sup>+</sup> (memory) (%)<br>(cells.mm <sup>-3</sup> )                                              | (13/30)<br>(85/450)            | 44<br>255 | 50<br>198 |
| CCR7 <sup>+</sup> CD45RA <sup>+</sup> / CD8 <sup>+</sup> (naïve) (%)                                                          | (52/68)                        | 24        | 8         |
| CCR7 <sup>+</sup> CD45RA <sup>-</sup> / CD8 <sup>+</sup> (central memory) (%)                                                 | (3-4)                          | 3         | 1         |
| CCR7 <sup>-</sup> CD27 <sup>-</sup> CD45RA <sup>-</sup> / CD8 <sup>+</sup> (effector memory) (%)<br>(cells.mm <sup>-3</sup> ) | (11/20)<br>(42/220)            | 64<br>391 | 81<br>583 |
| CCR7 <sup>-</sup> CD27 <sup>-</sup> CD45RA <sup>+</sup> / CD8 <sup>+</sup> (exhausted effector memory - EMRA) (%)             | (1-18)                         | 3.8       | 3.9       |
| CD127 <sup>low</sup> CD25 <sup>+</sup> / CD4 <sup>+</sup> (regulatory) (%)                                                    | (2-8)                          | 3.92      | 4.9       |
| Vα7 <sup>+</sup> CD161 <sup>+</sup> / CD3 <sup>+</sup> (MAIT) (%)                                                             | (1-8)                          | 0         | 0         |
| Vα24 <sup>+</sup> Vβ11 <sup>+</sup> CD161 <sup>+</sup> / CD3 <sup>+</sup> (NKT) (%)                                           | (>0.02)                        | 0         | 0         |
| <b>T-cell proliferation (cpm.10<sup>-3</sup>)</b>                                                                             |                                |           |           |
| PHA (6.25 mg ml <sup>-1</sup> )                                                                                               | (>50)                          | 84        | 27        |
| OKT3 (50 ng ml <sup>-1</sup> )                                                                                                | (>30)                          | N.D.      | 26        |
| <i>Candidine</i>                                                                                                              | (>10)                          | 8.4       | 3.1       |
| <i>Tetanus toxoid</i>                                                                                                         | (>10)                          | 6.3       | 1.2       |
| <i>Tuberculin</i>                                                                                                             | (>10)                          | 4.2       | 1         |
| <b>NK cells</b>                                                                                                               |                                |           |           |
| CD16 <sup>+</sup> CD56 <sup>+</sup> (cells.mm <sup>-3</sup> )                                                                 | (100-480)                      | 68        | 162       |
| CD16 <sup>+</sup> CD56 <sup>+</sup> (%)                                                                                       | (4-17)                         | 4         | 9         |
| <b>B cells</b>                                                                                                                |                                |           |           |
| CD19 <sup>+</sup> (cells.mm <sup>-3</sup> )                                                                                   | (270-860)                      | 391       | 378       |
| CD19 <sup>+</sup> (%)                                                                                                         | (13-27)                        | 23        | 9         |
| CD21 <sup>+</sup> CD27 <sup>+</sup> / CD19 <sup>+</sup> (memory) (%)                                                          | (11-24)                        | 3         | 3.2       |
| IgD <sup>+</sup> IgM <sup>+</sup> / CD19 <sup>+</sup> CD21 <sup>+</sup> CD27 <sup>+</sup> (marginal zone) (%)                 | (31-51)                        | 53.3      | 50.6      |
| IgD <sup>-</sup> IgM <sup>-</sup> / CD19 <sup>+</sup> CD21 <sup>+</sup> CD27 <sup>+</sup> (switched) (%)                      | (21-49)                        | 35.4      | 23.2      |
