# Supplementary material
Source: PubMed Central journal article supplement (PMC6485470)

**a**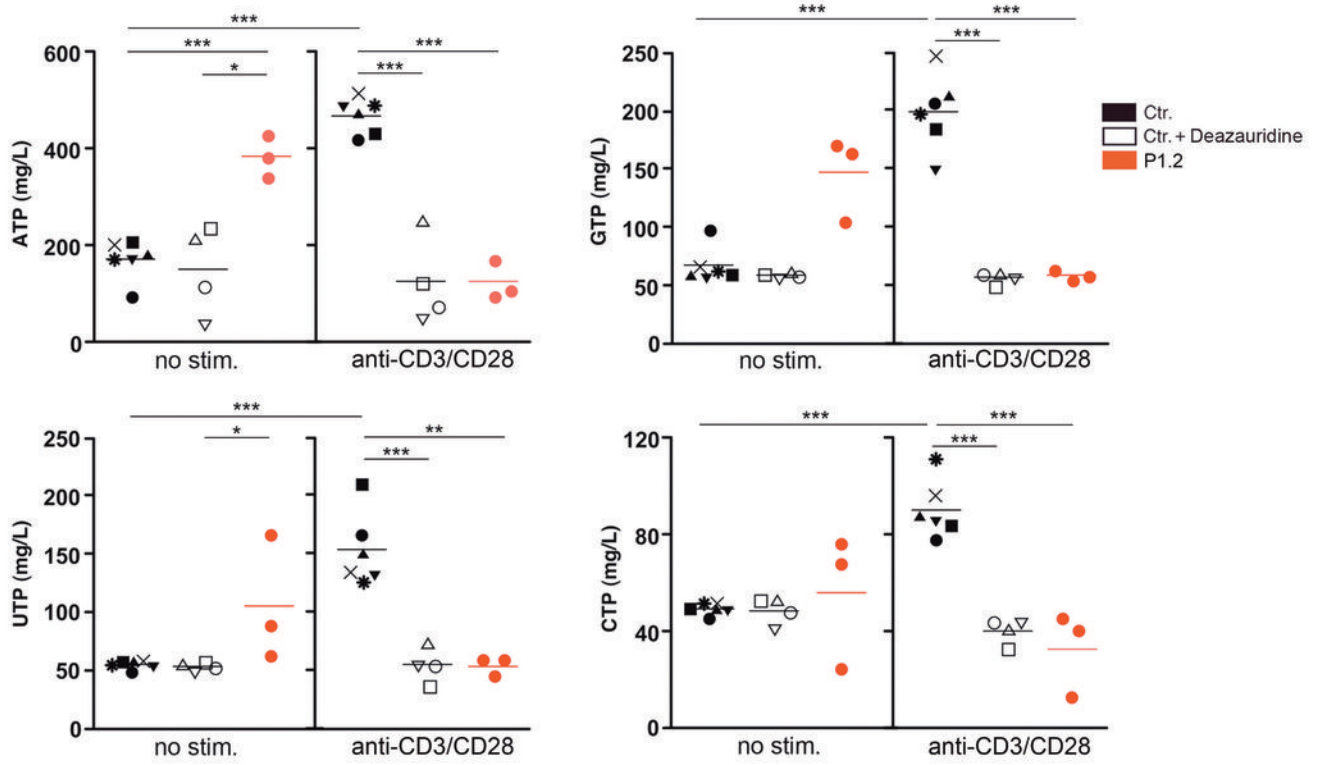**b**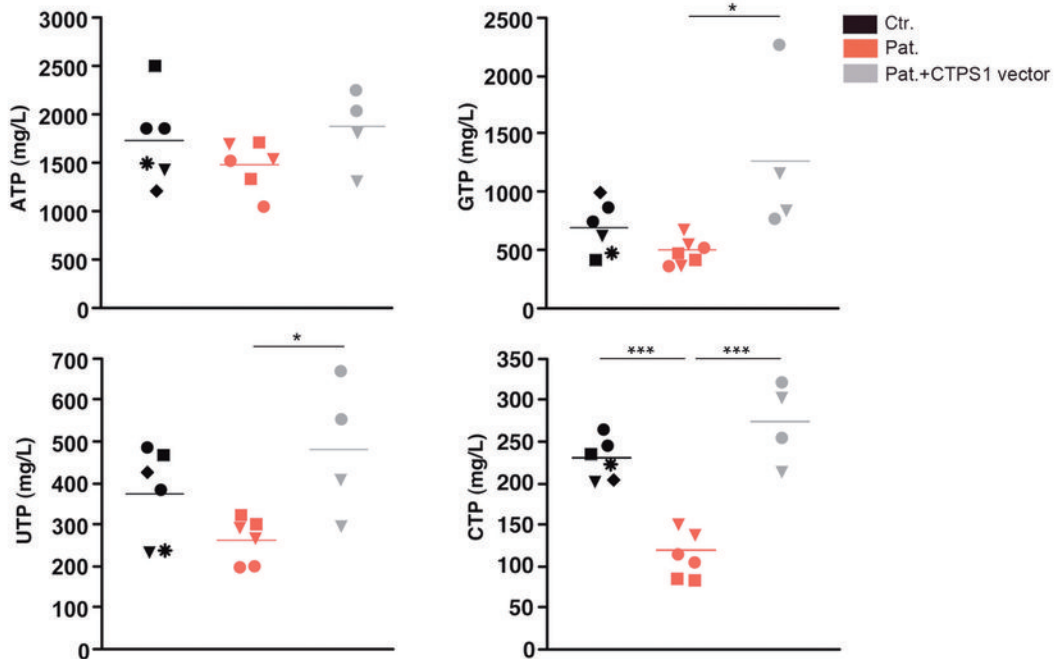

Supplement: NIHMS58235-supplement-ED_Fig8.pdf [file NIHMS58235-supplement-ED_Fig8.pdf]

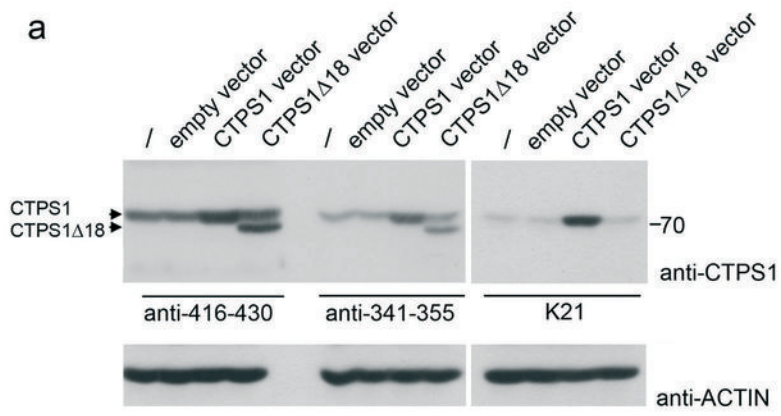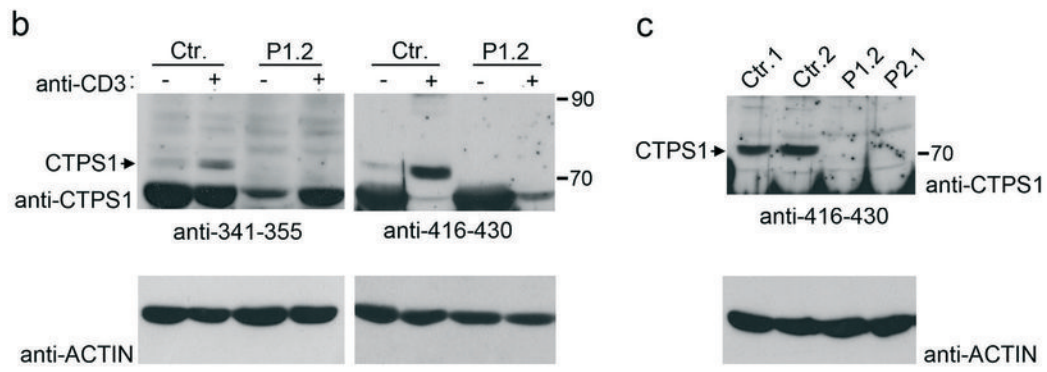

Supplement: NIHMS58235-supplement-ED_Fig_2.pdf [file NIHMS58235-supplement-ED_Fig_2.pdf]

**a**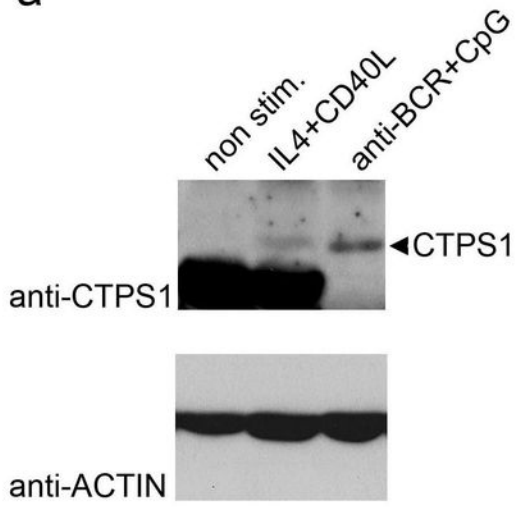**b**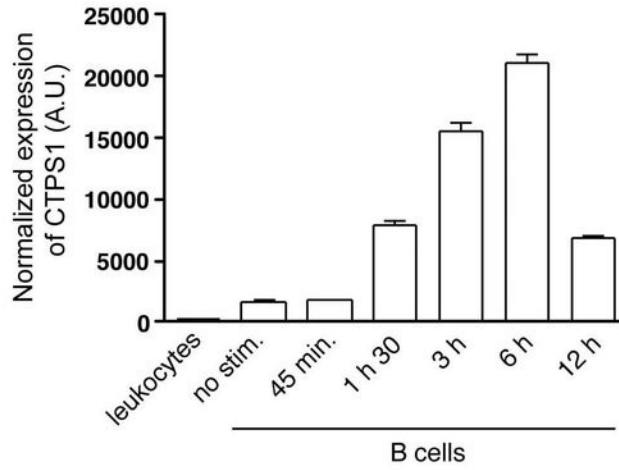**c**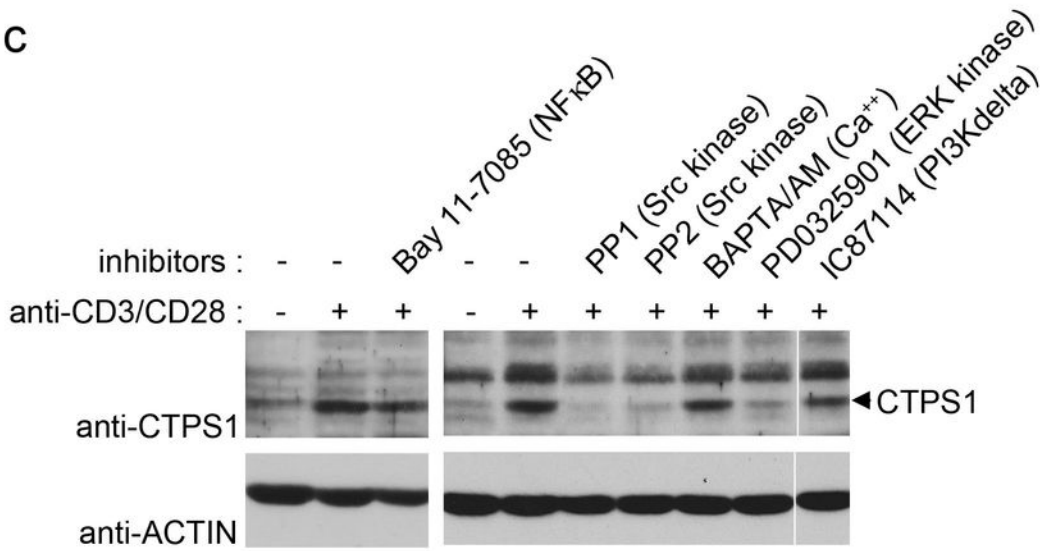

Supplement: NIHMS58235-supplement-ED_Fig_3.pdf [file NIHMS58235-supplement-ED_Fig_3.pdf]

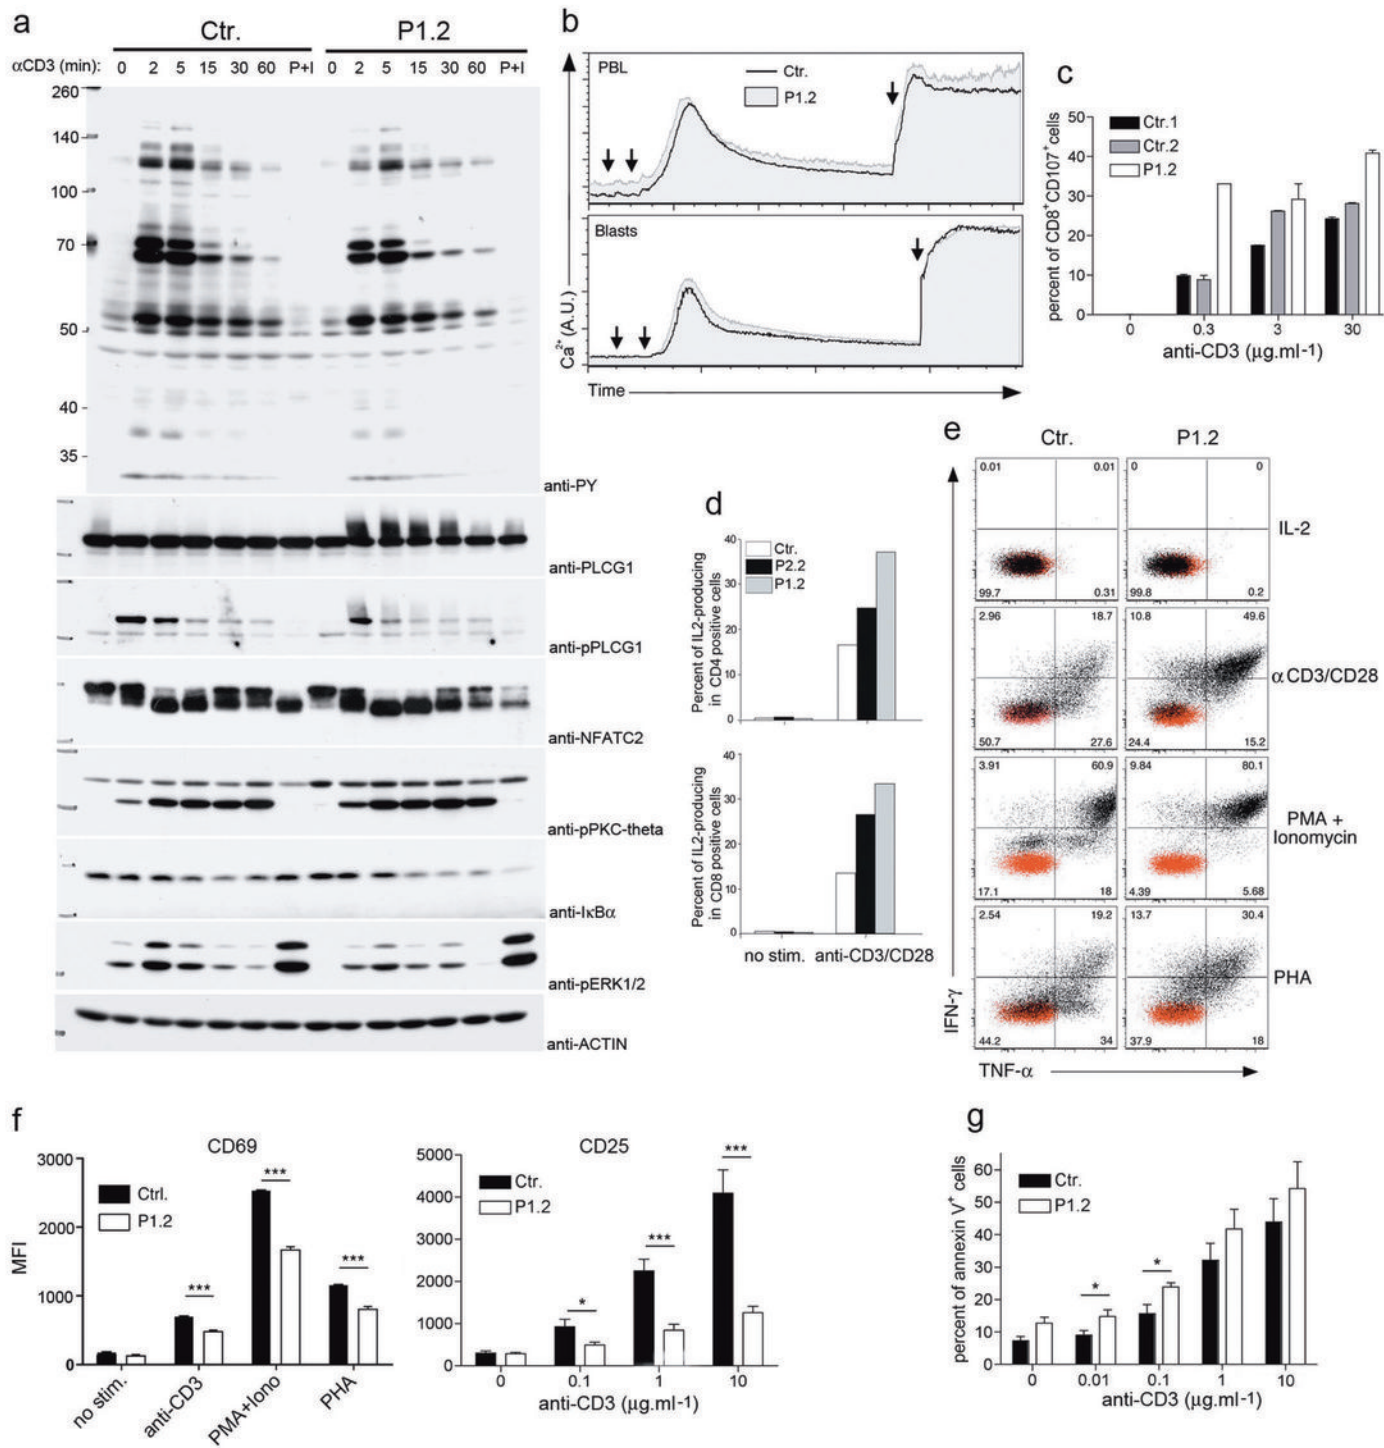

Supplement: NIHMS58235-supplement-ED_Fig_4.pdf [file NIHMS58235-supplement-ED_Fig_4.pdf]

**a**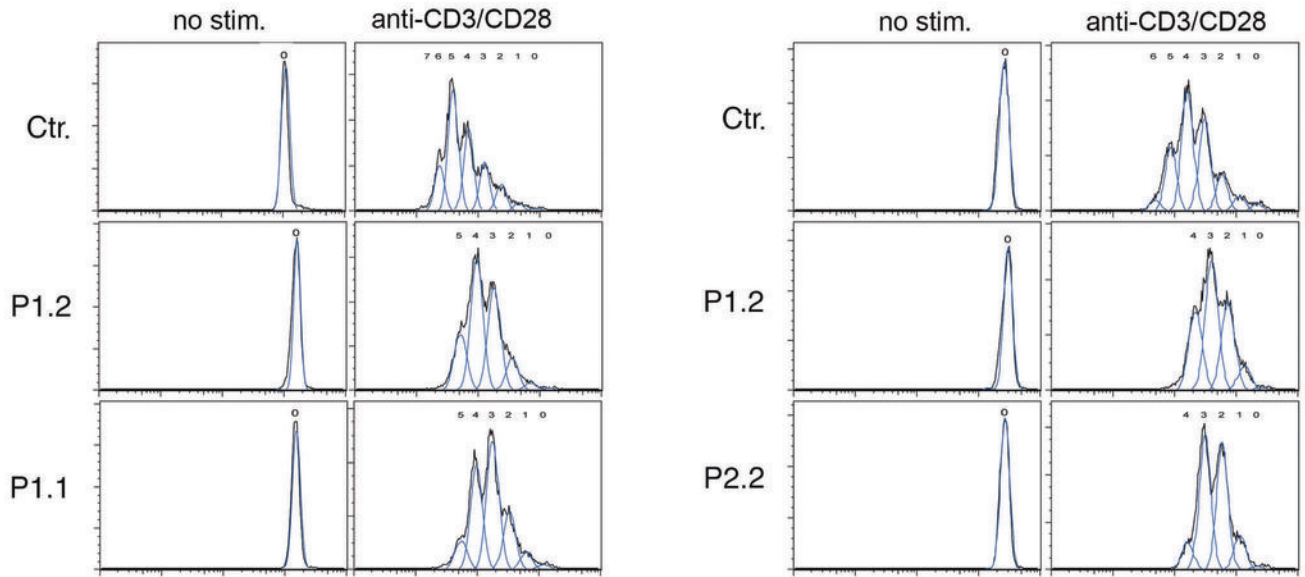**b**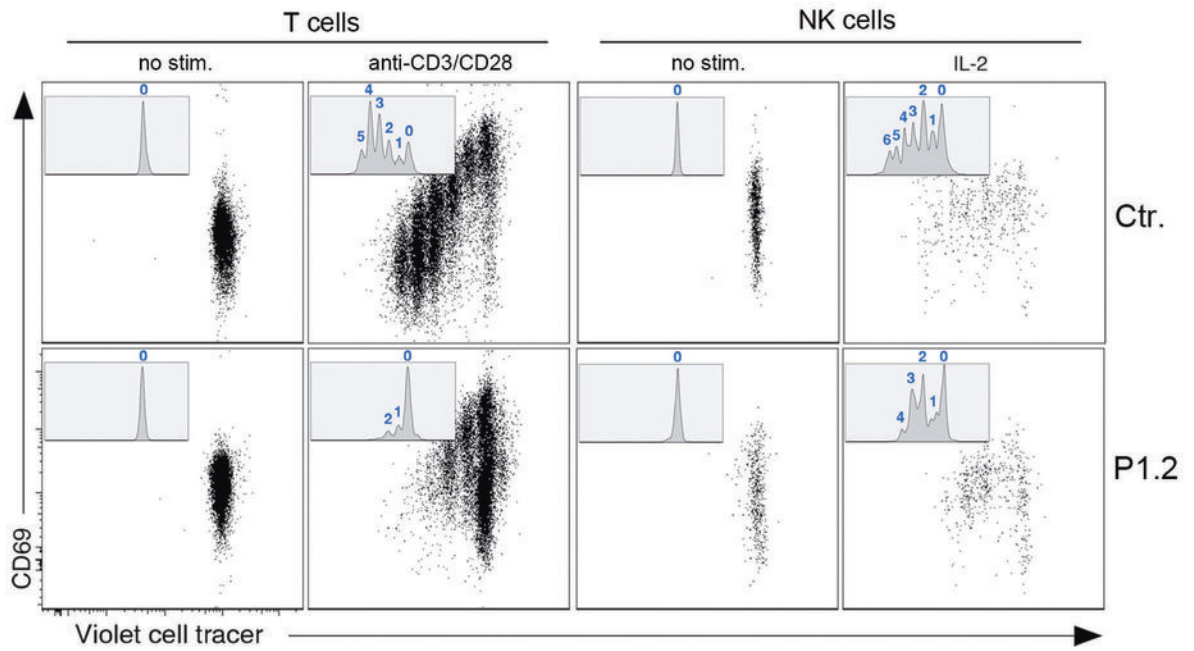

Supplement: NIHMS58235-supplement-ED_Fig_5.pdf [file NIHMS58235-supplement-ED_Fig_5.pdf]

**a**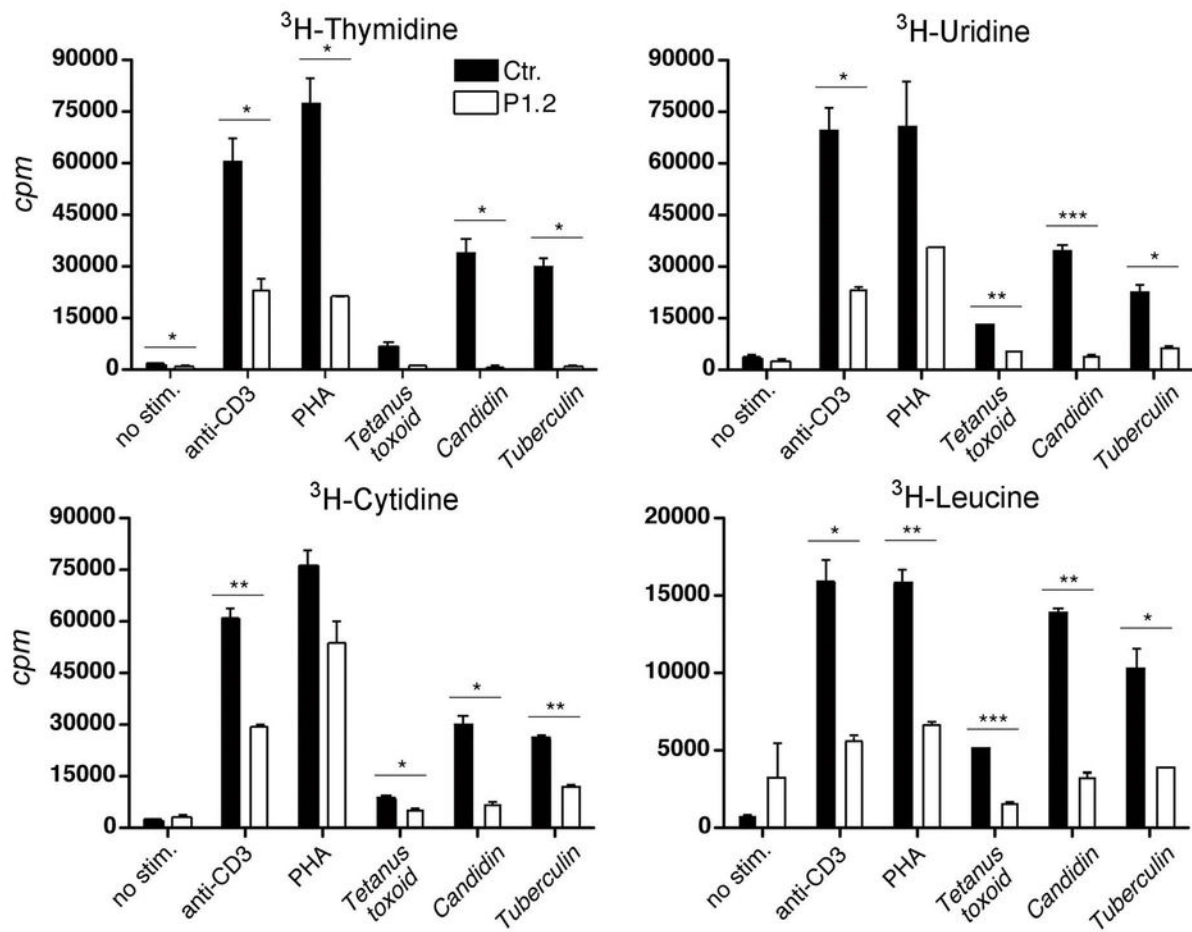**b**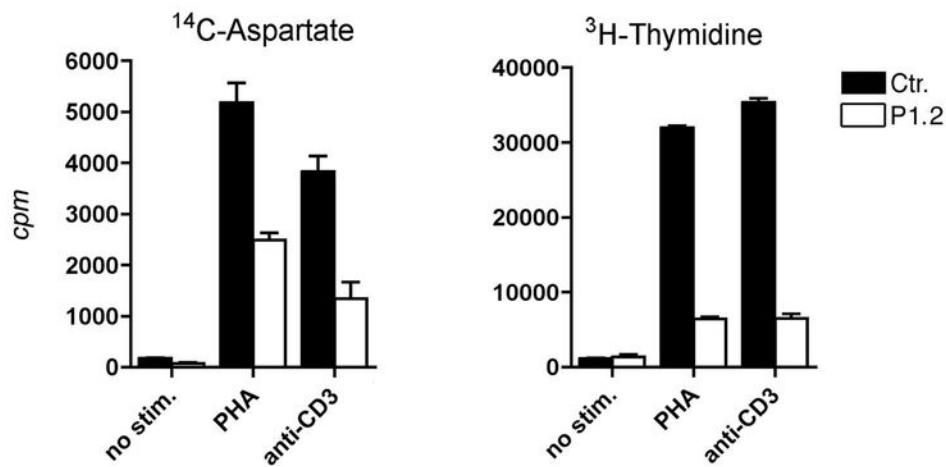**c**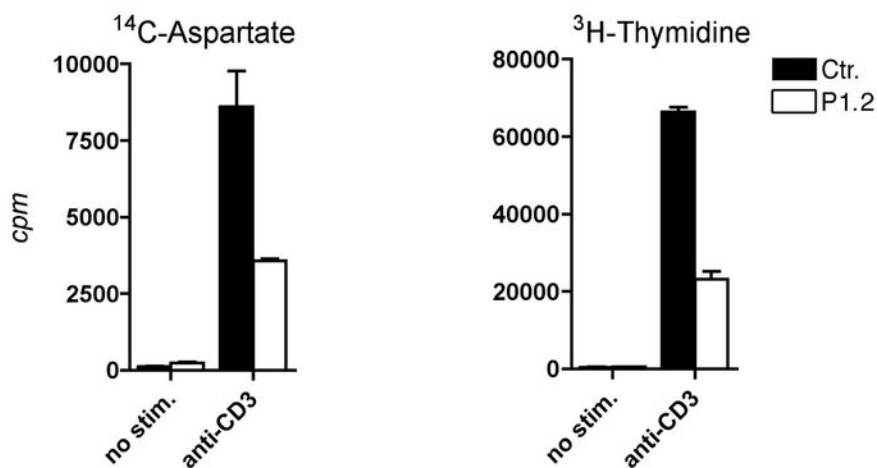

Supplement: NIHMS58235-supplement-ED_Fig_6.pdf [file NIHMS58235-supplement-ED_Fig_6.pdf]

**a**

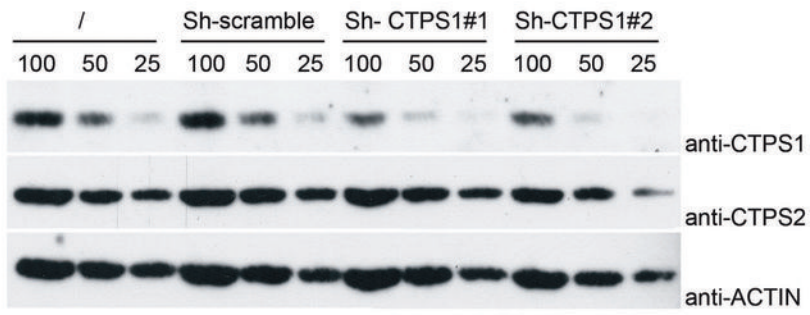

**b**

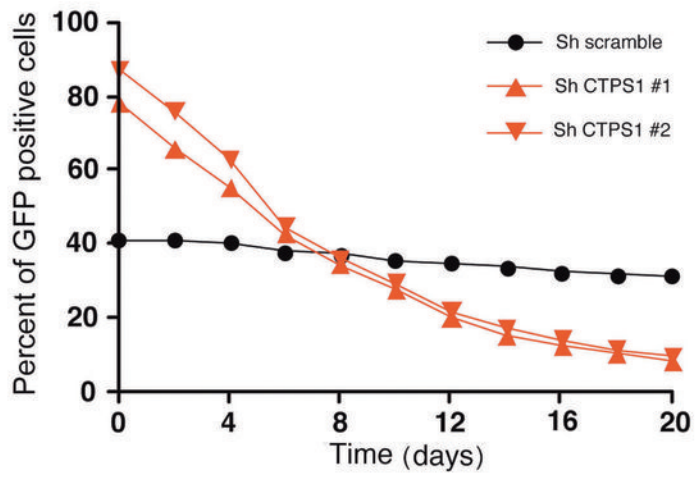

Supplement: NIHMS58235-supplement-ED_Fig_7.pdf [file NIHMS58235-supplement-ED_Fig_7.pdf]
